# Supplementary material
Source: Springer Nature journal article supplement (https://www.springermedizin.de/resource/supplementary/12981_2009_117_MOESM3_ESM.pdf/9603860)

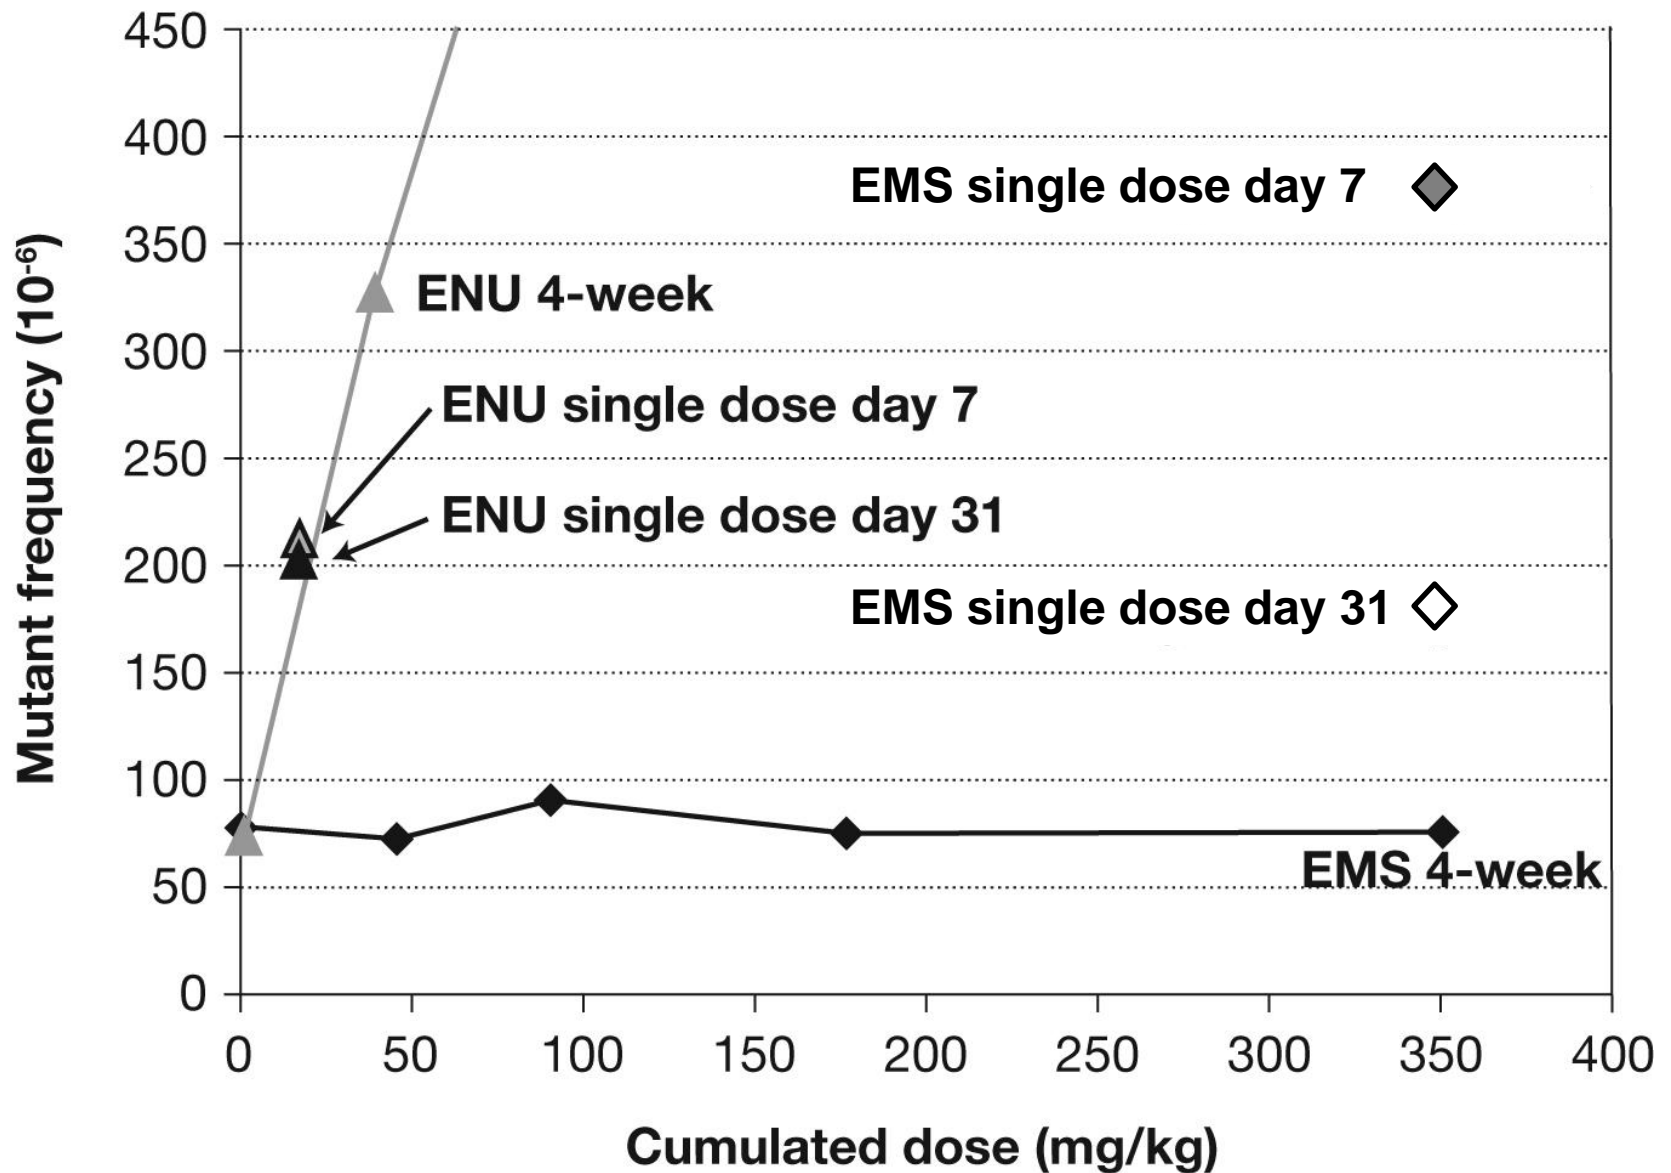

Single dose: 350 mg/kg/day x1 day = 350 mg/kg

Chronic dose: 12.5 mg/kg/day x28 days = 350 mg/kg

Supplement: MOESM3 [file 9603860]
